# Supplementary material for: A multifunctional metal–organic framework based tumor targeting drug delivery system for cancer therapy
Source: Royal Society of Chemistry journal article supplement (doi:10.1039/c5nr04045k), 2015-01-01
Supplement: c5nr04045k1.pdf [file c5nr04045k1.pdf]

**Electronic Supplementary Information (ESI)**

*of*

**A multifunctional metal-organic framework based tumor targeting drug delivery system for cancer  
therapy**

*Xiao-Gang Wang, Zhi-Yue Dong, Hong Cheng, Shuang-Shuang Wan, Wei-Hai Chen, Mei-Zhen Zou, Jia-Wei Huo, He-Xiang Deng\*, Xian-Zheng Zhang\**

**Table S1.** Zeta potential of different modified MIL-101.

| Sample                          | Zeta potential (mV) |
|---------------------------------|---------------------|
| MIL-101-NH <sub>2</sub> (Fe)    | 16.7±0.777          |
| MIL-101-N <sub>3</sub> (Fe)     | 21.7±0.462          |
| DOX@MIL-101-N <sub>3</sub> (Fe) | 8.23±0.156          |
| DOX@β-CD-SS-MIL-101             | -18.9±0.346         |
| DOX@PEG-RGD-β-CD-SS-MIL-101     | -1.3±0.332          |

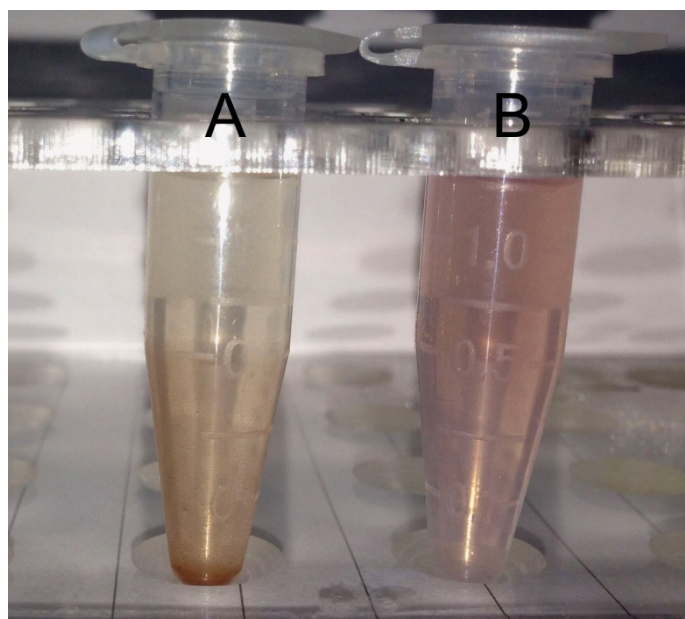

**Fig. S1.** Photographs of MIL-101-N<sub>3</sub>(Fe) (A) and DOX@PEG-RGD- $\beta$ -CD-SS-MIL-101 (B) dispersed in water for 24 hours. Nanoparticles were firstly ultrasonic dispersion in water at a concentration of 0.2 mg/mL. The clear colloidal suspensions were then left at dark before the photographs were taken.

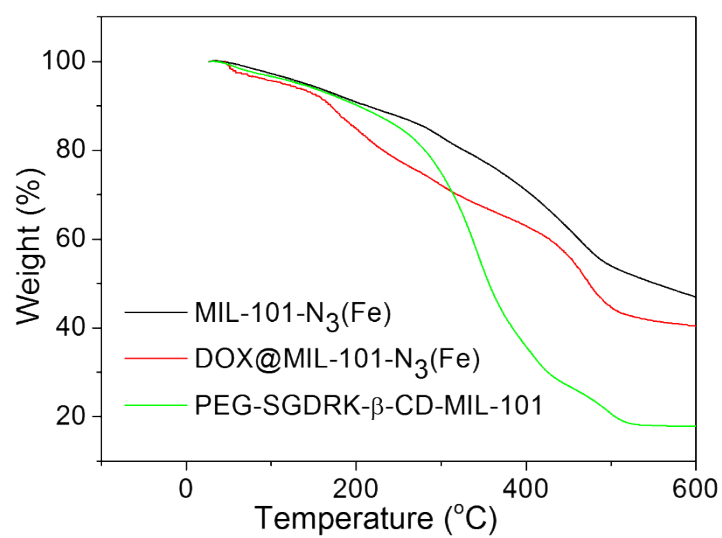

**Fig. S2** TGA curves of different nanoparticles: MIL-101-N<sub>3</sub>(Fe) (black line), DOX@MIL-101-N<sub>3</sub> (red line), and DOX@PEG-RGD-β-CD-SS-MIL-101 (green line).

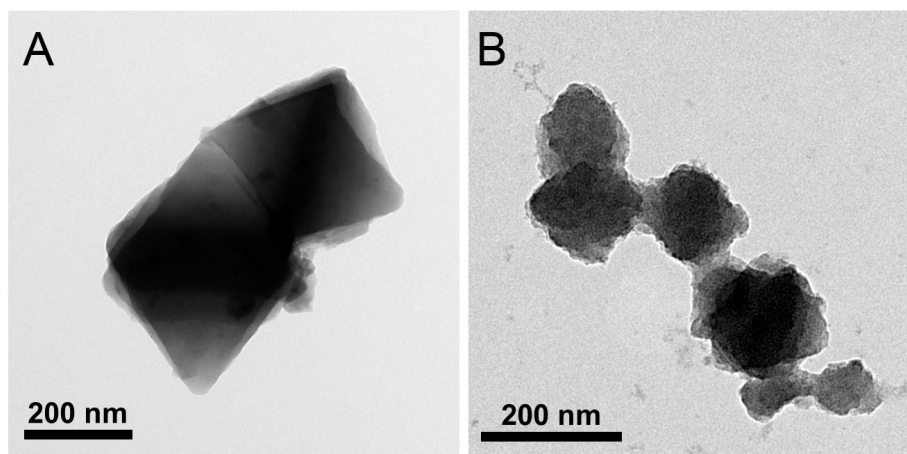

**Fig. S3** (A) TEM image of surface modified DOX loaded TTMOF incubated in 5 mM PBS for 2 days. (B) TEM image of non-modified DOX modified MIL-101-N<sub>3</sub>(Fe) incubated in 5 mM PBS for 2 days.

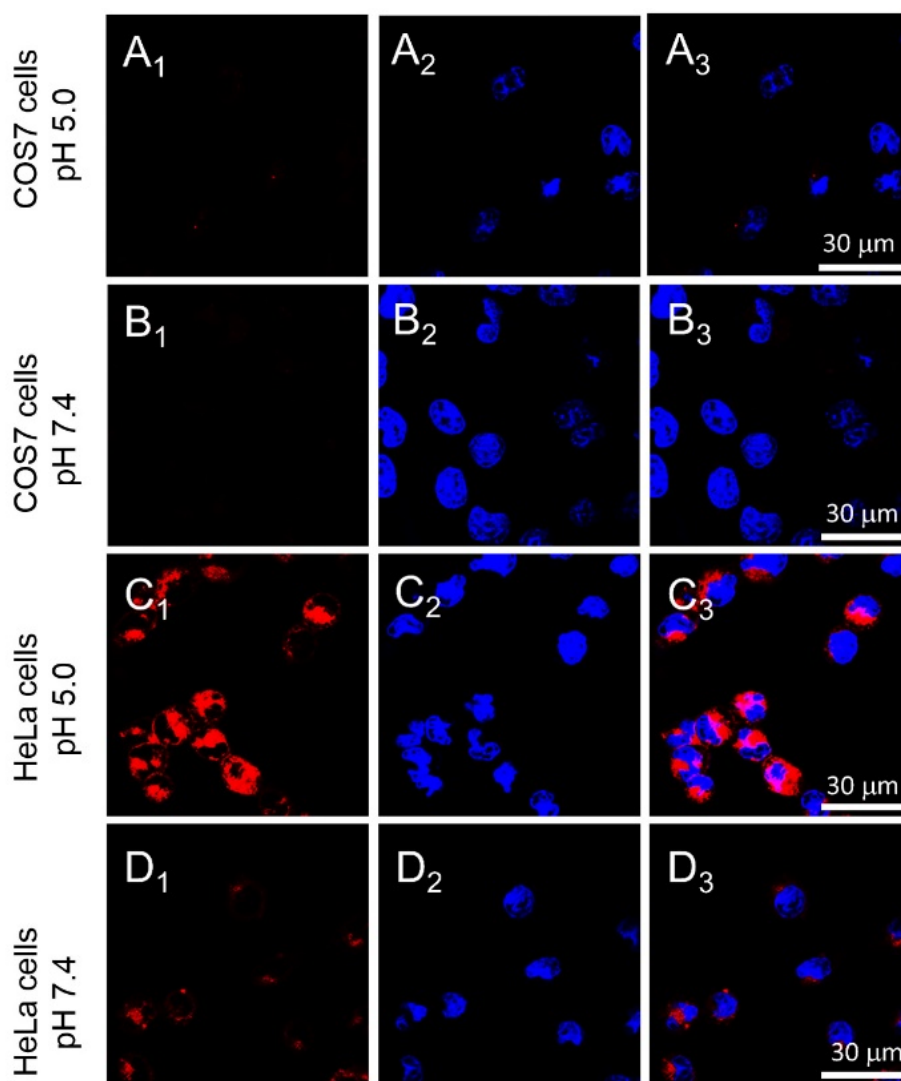

**Fig. S4** CLSM images of COS7 cells incubated with DOX loaded TTMOF at pH 5.0 (A<sub>1</sub>-A<sub>3</sub>) or pH 7.4 (B<sub>1</sub>-B<sub>3</sub>) for 90 min, and HeLa cells incubated with the DOX loaded TTMOF at pH 5.0 (C<sub>1</sub>-C<sub>3</sub>) or pH 7.4 (D<sub>1</sub>-D<sub>3</sub>) for 90 min. (A<sub>1</sub>, B<sub>1</sub>, C<sub>1</sub>, D<sub>1</sub>): Red fluorescence images of DOX; (A<sub>2</sub>, B<sub>2</sub>, C<sub>2</sub>, D<sub>2</sub>): Blue fluorescence images of nuclei; (A<sub>3</sub>, B<sub>3</sub>, C<sub>3</sub>, D<sub>3</sub>): The merge images of blue and red fluorescence.

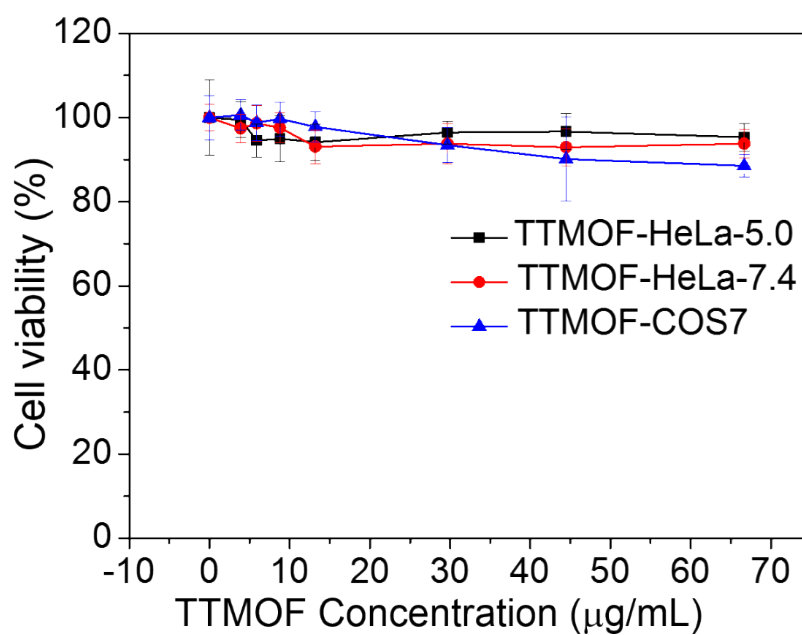

**Fig. S5** Cell viability of HeLa cells after incubated with empty TTMOF at different dose at pH 5.0 (black), and pH 7.4 (red); and cell viability of COS7 cells incubated with empty TTMOF at pH 7.4 (blue).

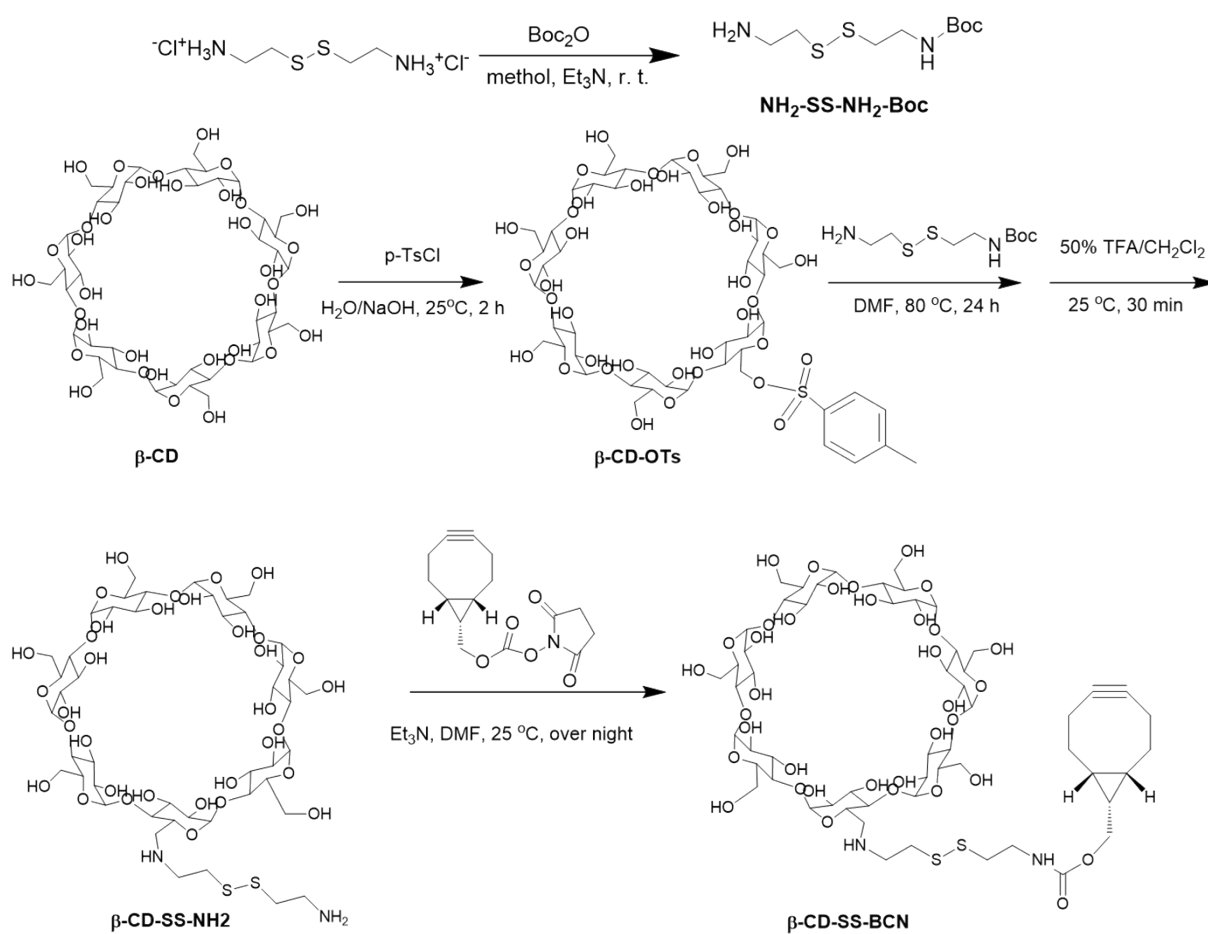

**Fig. S6** Synthesis procedure of bicyclononyne functionalized  $\beta\text{-CD}$  ( $\beta\text{-CD-SS-BCN}$ ).



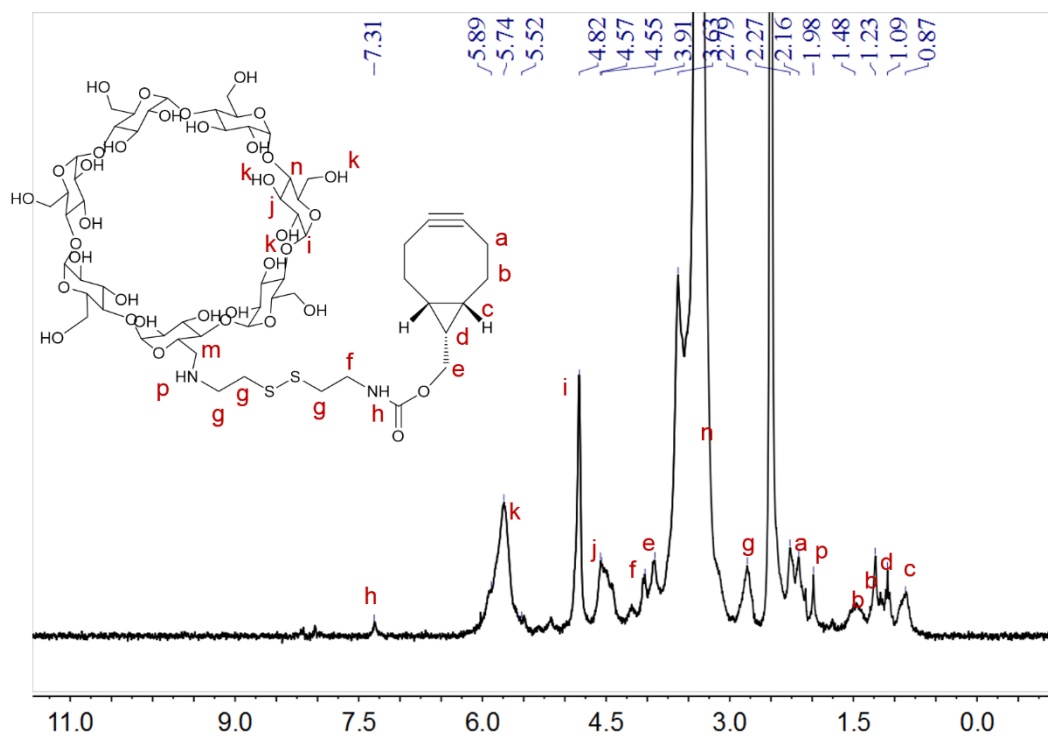

Fig. S7 <sup>1</sup>H NMR spectrum of β-CD-SS-BCN.

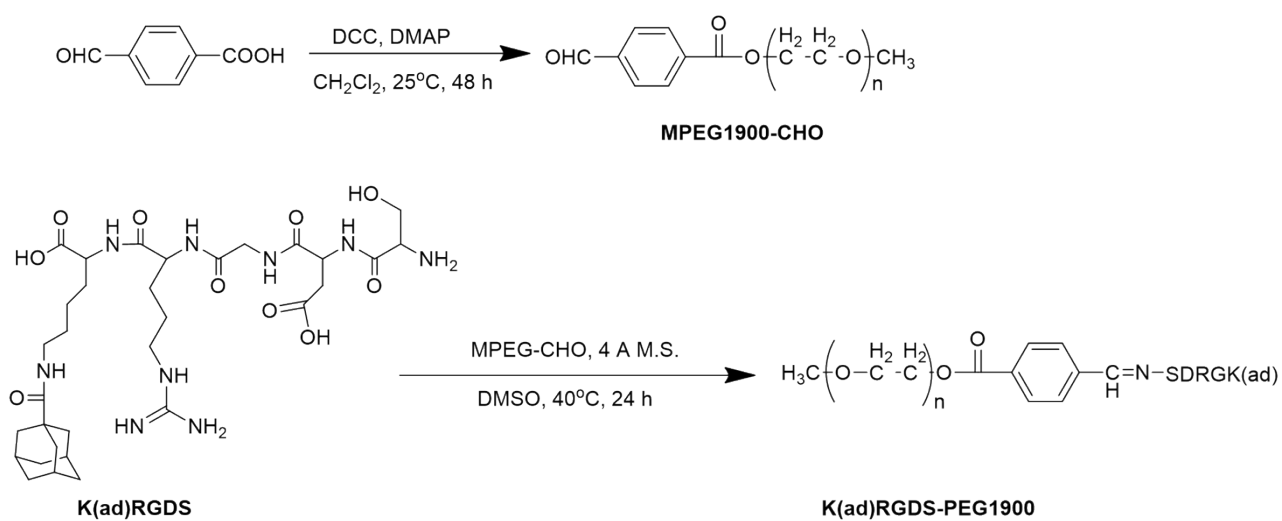

**Fig. S8** Synthesis procedure of K(ad)RGDS-PEG1900.



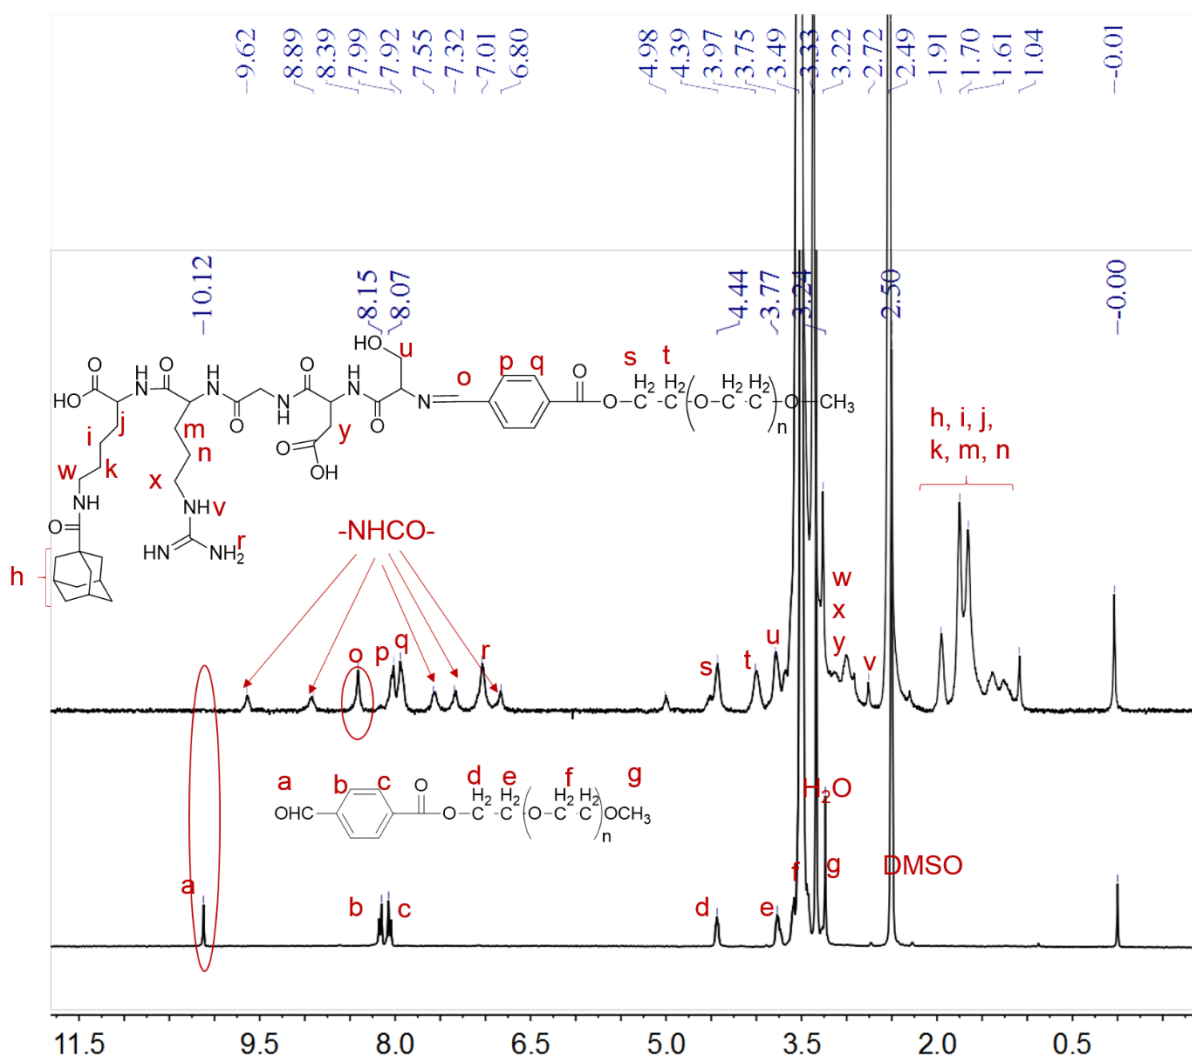

**Fig. S10**  $^1\text{H NMR}$  spectrum of MPEG-1900-CHO and K(ad)RGDS-PEG-1900.

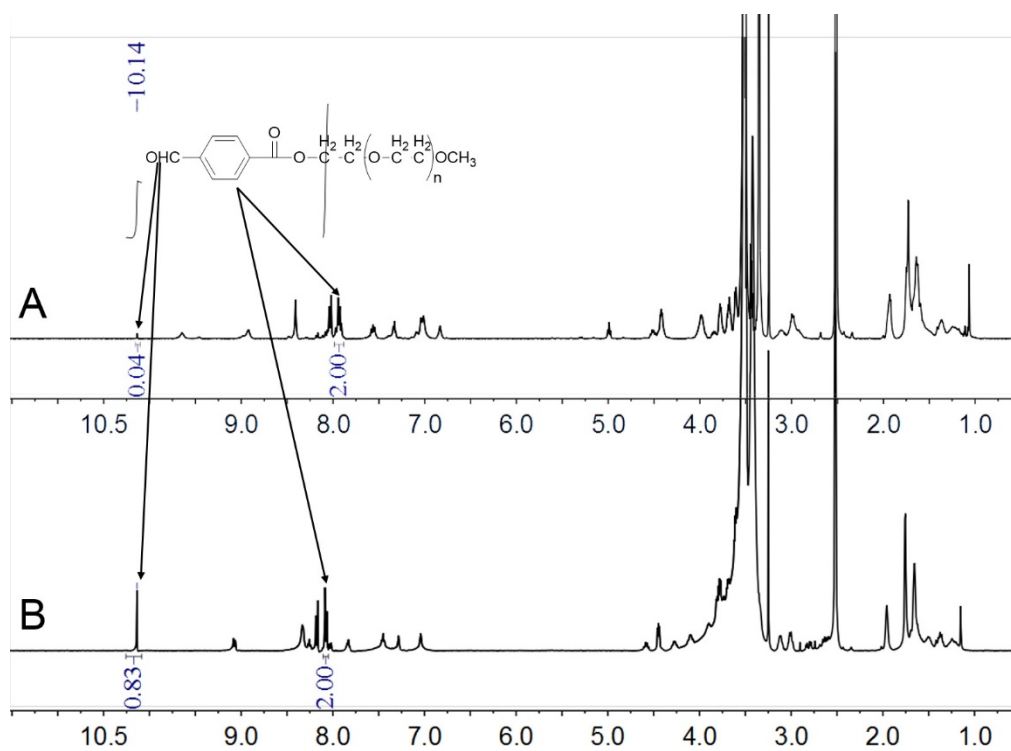

**Fig. S11**  $^1\text{H}$ NMR spectrums of K(ad)RGDS-PEG-1900 after incubated in PBS 7.4 (A) or ABS 5.0 (B) at 37 °C for 2 hours.
